# Supplementary material for: Oxidative-extractive deep desulfurization of gasoline by functionalized heteropoly acid catalysts
Source: Royal Society of Chemistry journal article supplement (doi:10.1039/c5ra16013h), 2015-01-01
Supplement: c5ra16013h1.pdf [file c5ra16013h1.pdf]

# **Oxidative-Extractive Deep Desulfurization of Gasoline by Functionalized Heteropoly Acid Catalyst**

Feng-Li Yu,<sup>a</sup> Chun-Yu Liu,<sup>a</sup> Pan-Hui Xie,<sup>a</sup> Bing Yuan,<sup>a</sup> Cong-Xia Xie,<sup>\*a</sup> Shi-Tao Yu<sup>b</sup>

<sup>a</sup> *State Key Laboratory Base of Eco-chemical Engineering, College of Chemistry and Molecular Engineering, Qingdao University of Science and Technology, Qingdao, 266042, China.*

<sup>b</sup> *College of Chemical Engineering, Qingdao University of Science and Technology, Qingdao, 266042, China.*

- 1. Synthesis of heteropoly acid catalyst**
- 2. Optimization of reaction conditions for O<sub>2</sub> ECODS**
- 3. Optimization of reaction conditions for H<sub>2</sub>O<sub>2</sub> ECODS**
- 4. IR spectra of the heteropoly blue 3**

---

\*Corresponding author. Tel.: +86 532 84023927; Fax: +86 532 84023927.

E-mail address: xiecongxia@126.com (C. X. Xie).

## 1. Synthesis of heteropoly acid catalyst

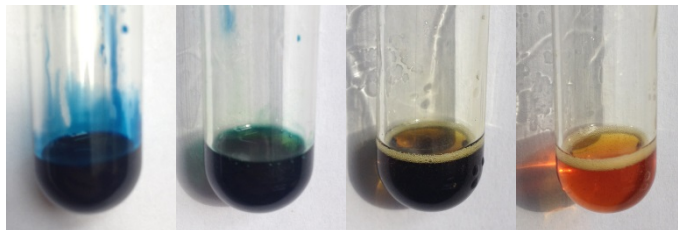

Fig. 1 The color change for the synthesis of heteropoly acid catalyst

## 2. Optimization of reaction conditions for O<sub>2</sub> ECODS

For O<sub>2</sub> ECODS system, the selected optimum conditions are as follows: the heteropoly blue 3 (n=148, m=4.0 g), P(O<sub>2</sub>)=1.0 MPa, T=105 °C and t=2 h. Under the optimum conditions, the desulfurization rate can reach 85%.

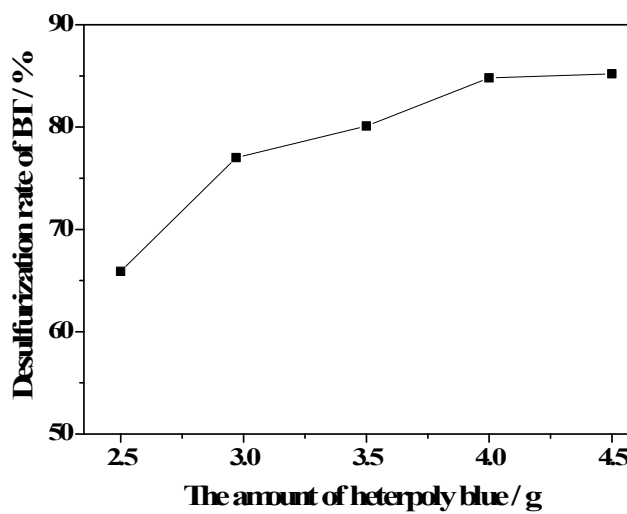

Fig. 2 Influence of the amount of the heteropoly blue on the desulfurization rate

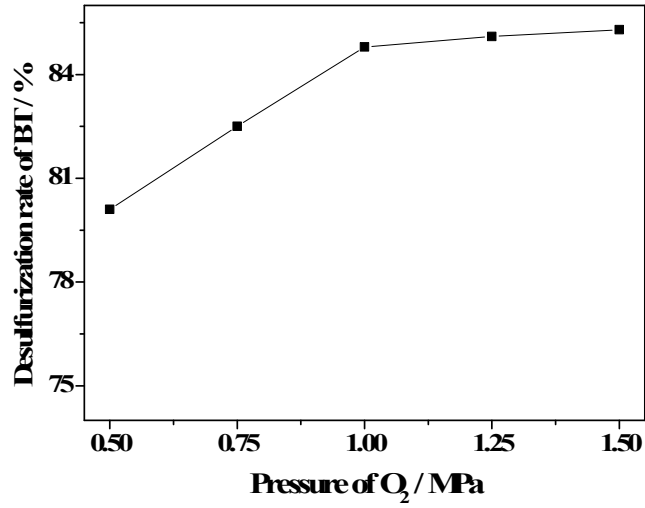

Fig. 3 Influence of oxygen pressure on the desulfurization rate

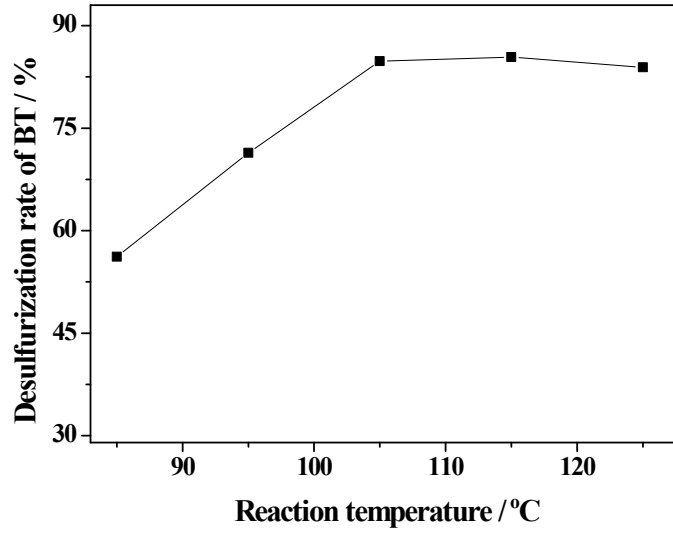

Fig. 4 Influence of reaction temperature on the desulfurization rate

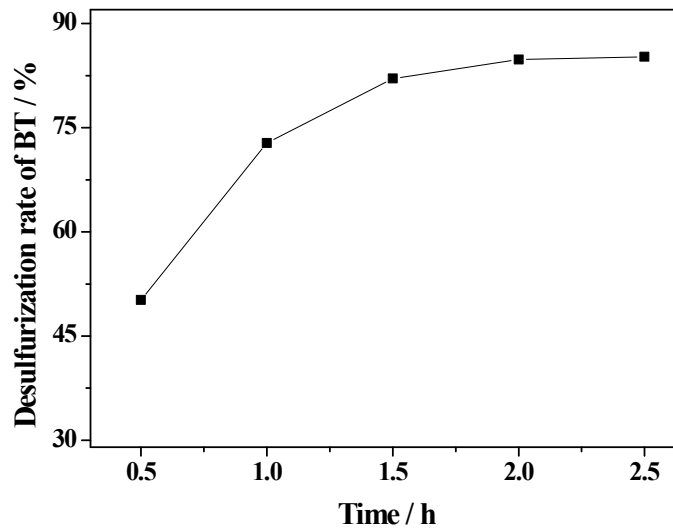

Fig. 5 Influence of reaction time on the desulfurization rate

### 3. Optimization of reaction conditions for H<sub>2</sub>O<sub>2</sub> ECODS

For H<sub>2</sub>O<sub>2</sub> ECODS system, the selected optimal reaction conditions are as follows: the heteropoly blue 3 (n=108, m=1.5 g), V(H<sub>2</sub>O<sub>2</sub>, 30 wt%)=50 μL, T=45 °C and t=20 min. Under the above conditions, the sulfur compound of BT can be completely removed.

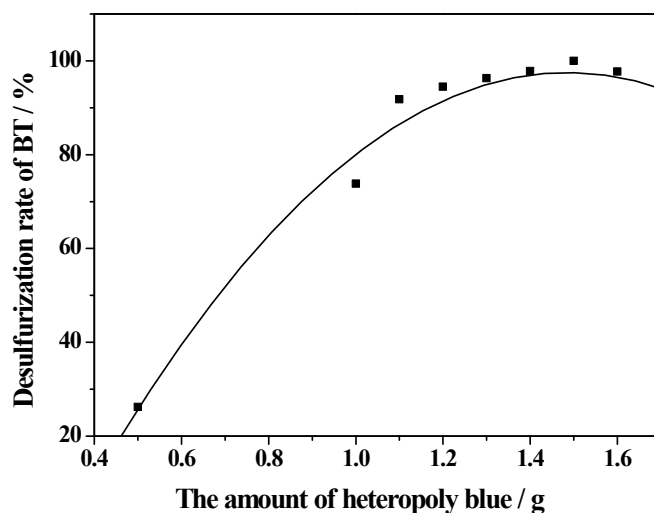

Fig. 6 Influence of the amount of the heteropoly blue on the desulfurization rate

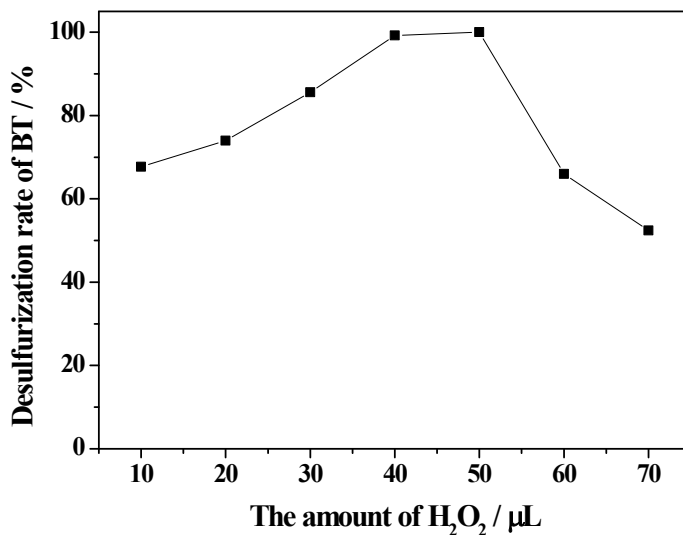

Fig. 7 Influence of the amount of H<sub>2</sub>O<sub>2</sub> on the desulfurization rate

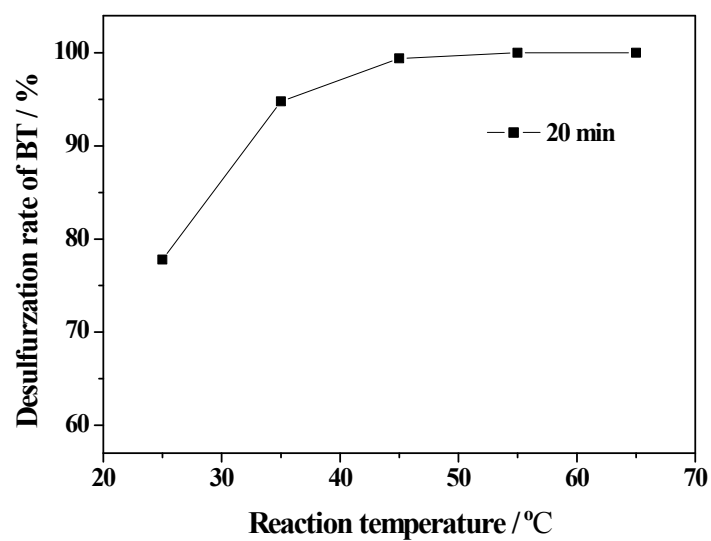

Fig. 8 Influence of reaction temperature on the desulfurization rate

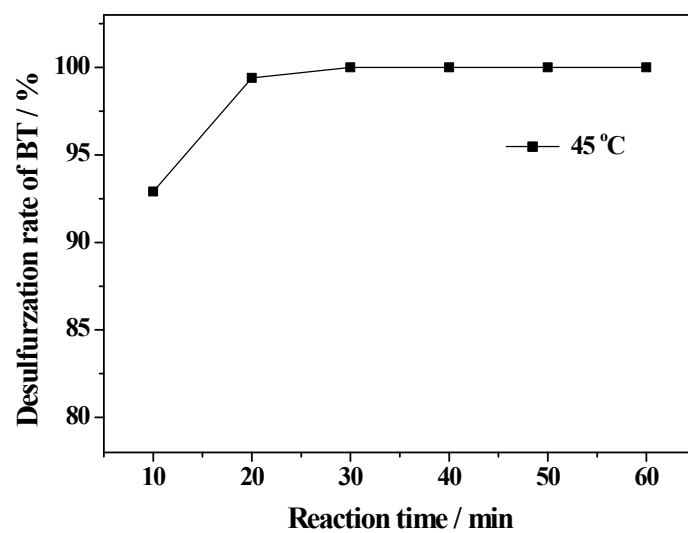

Fig. 9 Influence of reaction time on the desulfurization rate

#### 4. IR spectra of the heteropoly blue 3

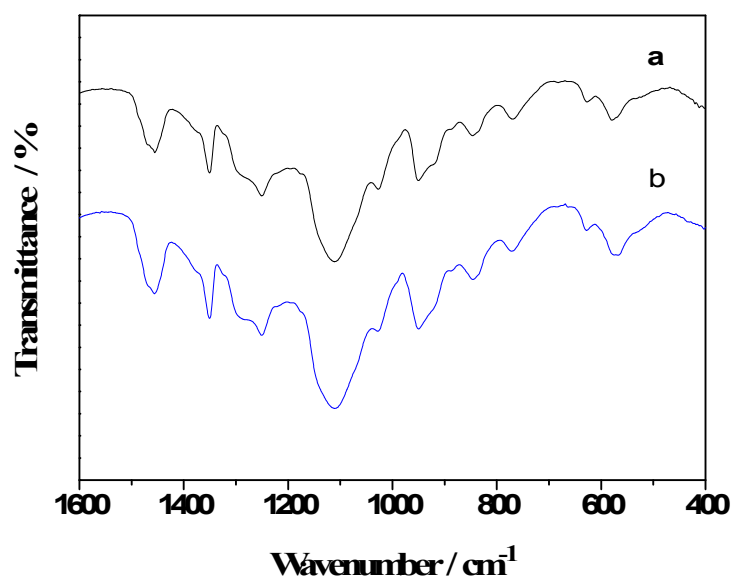

**Fig. 10** IR spectra of the heteropoly blue 3 (the curve a: fresh; the curve b: the regenerated after OEDS)
